# Supplementary material for: Antimicrobial Resistance Profiles of Escherichia coli and Salmonella Isolates in Canadian Broiler Chickens and Their Products
Source: PubMed Central journal article supplement — Foodborne Pathog Dis. 2020 Nov 6;17(11):672–8. doi: 10.1089/fpd.2019.2776 (PMC7692893; doi:10.1089/fpd.2019.2776), 2020-11-06
Supplement: Supp_Tables1-2.pdf [file Supp_Tables1-2.pdf]

## Supplementary Data

SUPPLEMENTARY TABLE S1. DISTRIBUTION OF *SALMONELLA* ISOLATES ACCORDING TO SEROVAR AND REGION

| <i>Province/region<br/>Serovar</i> | <i>Atlantic</i> | <i>British Columbia</i> | <i>Ontario</i> | <i>Prairies</i> | <i>Quebec</i> | <i>Total</i> |
|------------------------------------|-----------------|-------------------------|----------------|-----------------|---------------|--------------|
| Kentucky                           | 29              | 102                     | 252            | 85              | 194           | 662          |
| Heidelberg                         | 57              | 17                      | 113            | 14              | 116           | 317          |
| Other <sup>a</sup>                 | 42              | 26                      | 62             | 42              | 41            | 213          |
| Enteritidis                        | 0               | 61                      | 11             | 28              | 3             | 103          |
| Infantis                           | 2               | 4                       | 6              | 29              | 4             | 45           |
| Thompson                           | 6               | 1                       | 8              | 7               | 20            | 42           |
| Typhimurium                        | 1               | 0                       | 4              | 24              | 12            | 41           |
| Hadar                              | 2               | 5                       | 11             | 8               | 13            | 39           |
| Schwarzengrund                     | 0               | 1                       | 4              | 25              | 3             | 33           |
| Total                              | 139             | 217                     | 471            | 262             | 406           | 1495         |

<sup>a</sup>There were other serovars isolated, representing less than 2% of the total each.

SUPPLEMENTARY TABLE S2. DISTRIBUTION OF *SALMONELLA* ISOLATES ACCORDING TO SAMPLE TYPE AND STAGE IN THE PROCESSING CHAIN

|                 | <i>Slaughter</i> | <i>Processing</i> | <i>Retail</i> | <i>Total</i> |
|-----------------|------------------|-------------------|---------------|--------------|
| Caeca           | 807              | 0                 | 0             | 807          |
| Parts           | 0                | 273               | 174           | 447          |
| Whole carcasses | 0                | 168               | 73            | 241          |
| Total           | 807              | 441               | 247           | 1495         |
