# Supplementary material for: Antimicrobial Resistance Profiles of Escherichia coli and Salmonella Isolates in Canadian Broiler Chickens and Their Products
Source: PubMed Central journal article supplement — Foodborne Pathog Dis. 2020 Nov 6;17(11):672–8. doi: 10.1089/fpd.2019.2776 (PMC7692893; doi:10.1089/fpd.2019.2776), 2020-11-06
Supplement: Supp_Tables3-5.pdf [file Supp_Tables3-5.pdf]

SUPPLEMENTARY TABLE S3. NUMBER OF RESISTANT *SALMONELLA* ISOLATES (%)  
TO SEVEN DIFFERENT ANTIMICROBIAL CLASSES, BY REGION

|                  | <i>Aminoglycosides</i> | $\beta$ - <i>Lactams</i> | <i>Folate inhibitors</i> | <i>Macrolides</i> | <i>Phenicol</i> s | <i>Quinolones</i> | <i>Tetracyclines</i> |
|------------------|------------------------|--------------------------|--------------------------|-------------------|-------------------|-------------------|----------------------|
| Atlantic         | 38 (27.3)              | 36 (25.9)                | 12 (8.6)                 | 0 (0)             | 3 (2.2)           | 0 (0)             | 39 (28.1)            |
| British Columbia | 104 (47.9)             | 121 (55.8)               | 2 (0.9)                  | 0 (0)             | 1 (0.5)           | 7 (3.2)           | 104 (47.9)           |
| Ontario          | 197 (41.8)             | 151 (32.1)               | 48 (10.2)                | 0 (0)             | 2 (0.4)           | 0 (0)             | 192 (40.8)           |
| Prairies         | 92 (35.1)              | 71 (27.1)                | 8 (3.1)                  | 0 (0)             | 3 (1.1)           | 0 (0)             | 98 (37.4)            |
| Quebec           | 196 (48.3)             | 105 (25.9)               | 23 (5.7)                 | 0 (0)             | 2 (0.5)           | 0 (0)             | 209 (51.5)           |

SUPPLEMENTARY TABLE S4. PERCENTAGE  
OF *SALMONELLA* ISOLATES RESISTANT TO 15  
ANTIMICROBIALS, BY STAGE

| <i>Antimicrobial</i>          | <i>Percentage of isolates<br/>resistant in each stage</i> |                   |               |
|-------------------------------|-----------------------------------------------------------|-------------------|---------------|
|                               | <i>Abattoir</i>                                           | <i>Processing</i> | <i>Retail</i> |
| Amoxicilin-clavulanic acid    | 30.9                                                      | 30.2              | 34.0          |
| Ampicillin                    | 32.1                                                      | 31.5              | 34.8          |
| Azithromycin                  | 0.0                                                       | 0.0               | 0.0           |
| Cefoxitin                     | 30.6                                                      | 30.4              | 33.2          |
| Ceftiofur                     | 31.1                                                      | 30.6              | 33.6          |
| Ceftriaxone                   | 31.1                                                      | 30.6              | 34.0          |
| Chloramphenicol               | 0.9                                                       | 0.5               | 0.8           |
| Ciprofloxacin                 | 0.0                                                       | 0.0               | 0.0           |
| Gentamicin                    | 1.9                                                       | 2.7               | 1.6           |
| Kanamycin                     | 0.2                                                       | 0.2               | 0.0           |
| Nalidixic acid                | 0.6                                                       | 0.5               | 0.0           |
| Streptomycin                  | 43.9                                                      | 41.0              | 34.8          |
| Sulfisoxazole                 | 5.5                                                       | 7.5               | 6.5           |
| Tetracycline                  | 44.1                                                      | 43.1              | 38.9          |
| Trimethoprim-sulfamethoxazole | 1.1                                                       | 1.4               | 1.2           |

SUPPLEMENTARY TABLE S5. PERCENTAGE  
OF *SALMONELLA* ISOLATES RESISTANT TO 15  
ANTIMICROBIALS, BY SAMPLE TYPE

| <i>Antimicrobial</i>          | <i>Percentage of isolates<br/>resistant for each sample<br/>type</i> |              |                          |
|-------------------------------|----------------------------------------------------------------------|--------------|--------------------------|
|                               | <i>Caeca</i>                                                         | <i>Parts</i> | <i>Whole<br/>carcass</i> |
| Amoxicilin-clavulanic acid    | 30.9                                                                 | 32.2         | 30.3                     |
| Ampicillin                    | 32.1                                                                 | 33.6         | 31.1                     |
| Azithromycin                  | 0.0                                                                  | 0.0          | 0.0                      |
| Cefoxitin                     | 30.6                                                                 | 32.0         | 30.3                     |
| Ceftiofur                     | 31.1                                                                 | 32.4         | 30.3                     |
| Ceftriaxone                   | 31.1                                                                 | 32.7         | 30.3                     |
| Chloramphenicol               | 0.9                                                                  | 0.9          | 0.0                      |
| Ciprofloxacin                 | 0.0                                                                  | 0.0          | 0.0                      |
| Gentamicin                    | 1.9                                                                  | 2.9          | 1.2                      |
| Kanamycin                     | 0.2                                                                  | 0.2          | 0.0                      |
| Nalidixic acid                | 0.6                                                                  | 0.2          | 0.4                      |
| Streptomycin                  | 43.9                                                                 | 35.8         | 44.4                     |
| Sulfisoxazole                 | 5.5                                                                  | 8.1          | 5.4                      |
| Tetracycline                  | 44.1                                                                 | 38.5         | 47.3                     |
| Trimethoprim-sulfamethoxazole | 1.1                                                                  | 1.8          | 0.4                      |
